# Supplementary material
Source: PubMed Central journal article supplement (PMC2649020)
Supplement: ddn426_1.pdf [file ddn426_1.pdf]

**Supplementary Figure 1.** Dissected triceps muscles were fixed, sectioned and stained with hematoxylin and eosin. Cross-sectional areas were determined using MetaMorph software. Approximately 300 fibers per muscle were scored. Data are shown as means  $\pm$  SEM. n.s., not significant.

**Supplementary Figure 2.** Mice were weighed once daily before receiving vehicle (n = 15), or follistatin at 10 mg/kg q.a.d. (n = 10), 1 mg/kg q.a.d. (n = 15), or 0.75 mg/kg b.i.d. (n = 16). Wildtype mice (n = 56) were included for comparison. Weight was plotted against age.

**Supplementary Video 1.** Movie of spontaneous mouse ambulation. Shown are three SMA p13 littermates. Two pups on the left of the screen were vehicle treated. The pup on the right (black dot on forehead) was treated with 0.75 mg/kg b.i.d. follistatin.

Supplemental Figure 1.

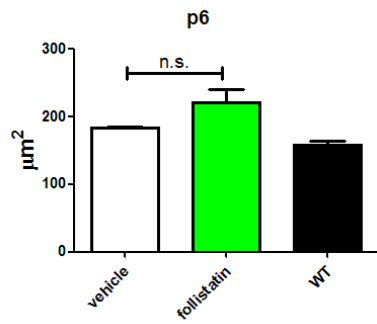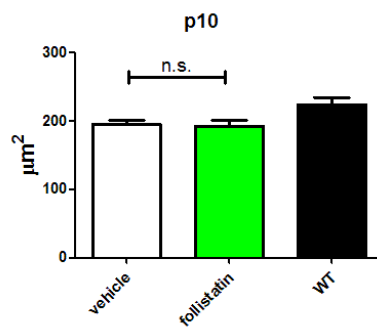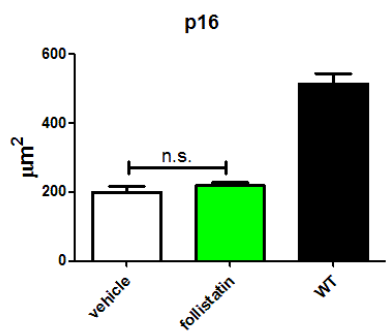

## Supplemental Figure 2

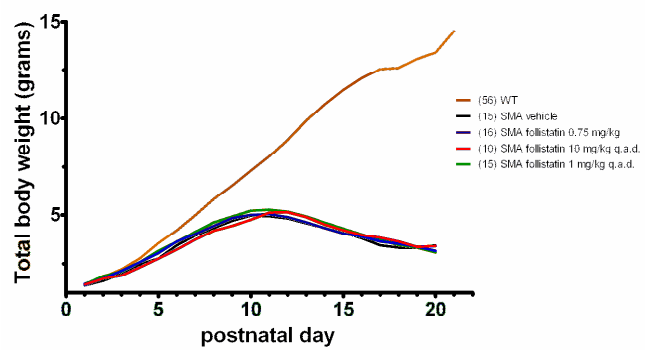

Supplementary Table

P values TTR success rates

|                      | p5     | p6     | p7     | p8     | p9     | p10    | p11    | p12    |
|----------------------|--------|--------|--------|--------|--------|--------|--------|--------|
| 0.75 mg/kg<br>b.i.d. | 0.4839 | 0.4815 | 0.2087 | 0.0128 | 0.0169 | 0.0036 | 1      | 0.0686 |
| 1 mg/kg q.a.d.       | 1      | 0.4815 | 0.1145 | 1      | 0.3111 | 0.0836 | 0.1283 | 0.087  |
| 10 mg/kg q.a.d.      | 1      | 0.1558 | 1      | 0.5422 | 0.655  | 0.5422 | 1      | 1      |

P values for TTR latencies

|                      | p7 | p8 | p9     | p10 | p11    | p12    |
|----------------------|----|----|--------|-----|--------|--------|
| 0.75 mg/kg<br>b.i.d. |    |    | 0.0979 |     | 0.3235 | 0.9192 |
| 1 mg/kg q.a.d.       |    |    |        |     | 0.9688 | 0.365  |
| 10 mg/kg q.a.d.      |    |    | 0.3552 |     | 0.7791 | 0.5897 |

P values for TTR analyses. Top, TTR success rates as shown in Figure 2 A-C. The treatment groups were compared to the vehicle group using 2x2 contingency tables and Fisher's exact test. Bottom, TTR mean turn times from each treatment group were compared to the vehicle group using Student's t-test. Note that a large number of mice, particularly in the vehicle group, was not able to turn within the 60 s allotted for this test. In these cases, 60 s was an arbitrary cut-off, not a real time measure, and these values were therefore excluded from the statistical analysis. Consequently, at several time points where less than 3 vehicle-treated mice were able to turn no P values were calculated.
